# Supplementary material for: Overexpression of MicroRNA-138 Affects the Proliferation and Invasion of Urothelial Carcinoma Cells by Suppressing SOX9 Expression
Source: MDPI journal article supplement (doi:10.3390/biomedicines11113064), 2023-11-15

Relative expression of SOX9 mRNA after transfection of T24 and UMUC2 urothelial carcinoma cell lines with 11 miRNA precursors.

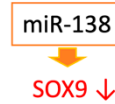

Putative binding site of miR-138 on SOX9 mRNA.

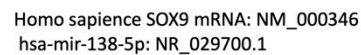

Supplement: s1 [file s1]
